# Supplementary material for: Contemporary epidemiological overview of malaria in Madagascar: operational utility of reported routine case data for malaria control planning
Source: Springer Nature journal article supplement (doi:10.1186/s12936-016-1556-3), 2016-10-18
Supplement: MOESM1 [file 10899168]

Supplementary table: Summary of data sources

| Manuscript figure           | Dataset                                                | Data type               | Source                                          | Method used to generate data                                 | Time period |
|-----------------------------|--------------------------------------------------------|-------------------------|-------------------------------------------------|--------------------------------------------------------------|-------------|
| Figure 2C                   | <i>Plasmodium falciparum</i> endemicity (PfPR)         | Raster                  | Malaria Atlas Project (www.map.ox.ac.uk)        | Geostatistical modelling                                     | 2010-2015   |
| Figure 2E                   | Digital Elevation                                      | Raster                  | Shuttle Radar Topography Mission (SRTM)         | Remote sensing                                               | n.a.        |
| Figure 2F                   | Rainfall (mean annual total)                           | Raster                  | NASA Tropical Rainfall Measuring Mission (TRMM) | Remote sensing                                               | 2010-2014   |
| Figure 2G                   | Temperature suitability                                | Raster                  | Malaria Atlas Project; Weiss <i>et al</i> 2015  | Remote sensing and modelling                                 | n.a.        |
| Figure 2H                   | Land-cover use                                         | Raster                  | IGBP MODIS annual landcover product MCD12Q1     | Remote sensing                                               | ca. 2015    |
| Figure 3A (case data)       | Reported RDT+ cases                                    | Case data               | NMCP, Madagascar                                | Routine health metric reporting system                       | 2010-2015   |
| Figure 3B (population data) | Case incidence                                         | Census data             | Ministry of Health, Madagascar                  | Population census (1993) adjusted to fixed growth rate       | 2010-2015   |
| Figure 4A                   | Count of health facility reports                       | Health facility reports | NMCP, Madagascar                                | Routine health system reporting                              | 2010-2015   |
| Figure 4B                   | RDT result reporting rate                              | Health facility reports | NMCP, Madagascar                                | Routine health system reporting                              | 2014        |
| Figure 4C                   | RDT stock-out incidence                                | Health facility reports | NMCP, Madagascar                                | Routine health system reporting                              | 2012-2014   |
| Figure 5A                   | Population density map                                 | Raster                  | WorldPop (www.worldpop.org)                     | Geostatistical modelling adjusted to UN population estimates | 2015        |
| Figure 5B                   | Health centre accessibility to population              | Health facility reports | NMCP, Madagascar                                | Health facility reporting                                    | ca. 2015    |
| Figure 5C                   | Health centre accessibility to health district offices | Health facility reports | NMCP, Madagascar                                | Health facility reporting                                    | ca. 2015    |
| Figure 6                    | Documented outbreaks                                   | Health facility reports | NMCP, Madagascar                                | Integrated Diseases Surveillance and Response System         | 2012-2015   |
| Figure 7                    | <i>Superimposes Figure 3B with Figure 6</i>            |                         |                                                 |                                                              |             |
| Additional file 2           | <i>Plasmodium falciparum</i> endemicity (PfPR)         | Raster                  | Malaria Atlas Project (www.map.ox.ac.uk)        | Geostatistical modelling                                     | 2010-2015   |
| Additional file 4           | Reported RDT+ cases                                    | Case data               | NMCP, Madagascar                                | Routine health metric reporting system                       | 2010-2015   |
